# Supplementary material for: Identification of Highly Methylated Genes across Various Types of B-Cell Non-Hodgkin Lymphoma
Source: PubMed Central journal article supplement (PMC3834187; doi:10.1371/journal.pone.0079602), 2013-11-19

# Figure S2

## A. DSP

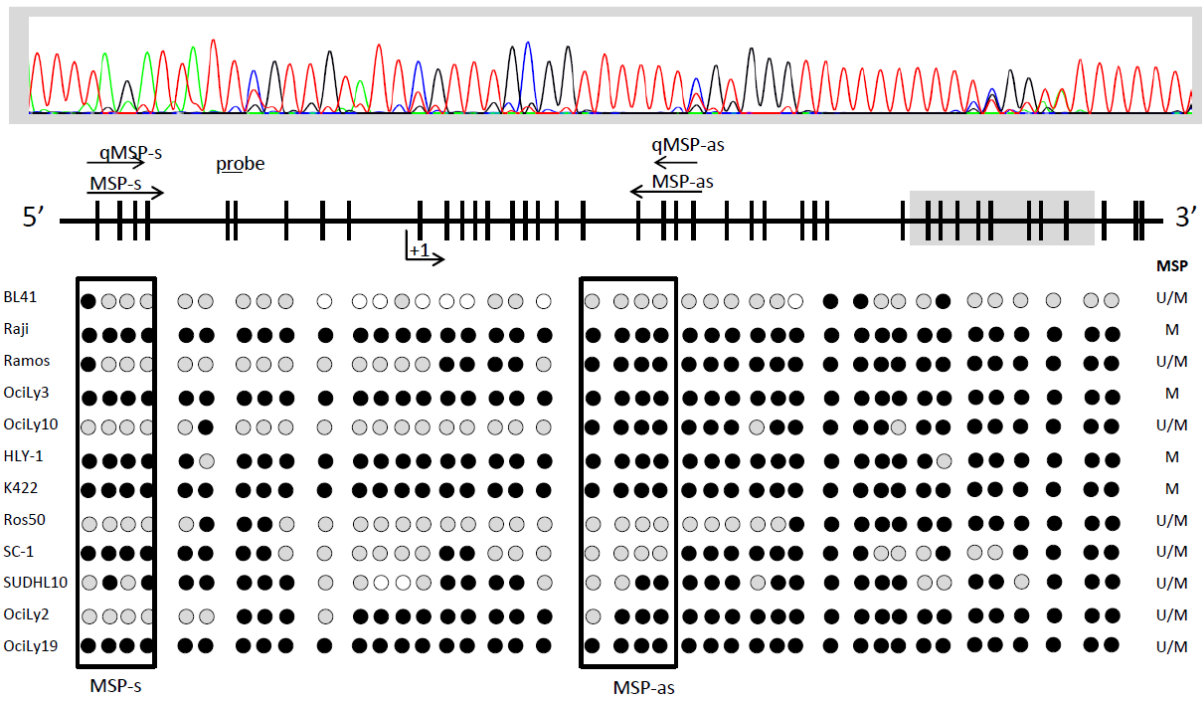

## B. FZD8

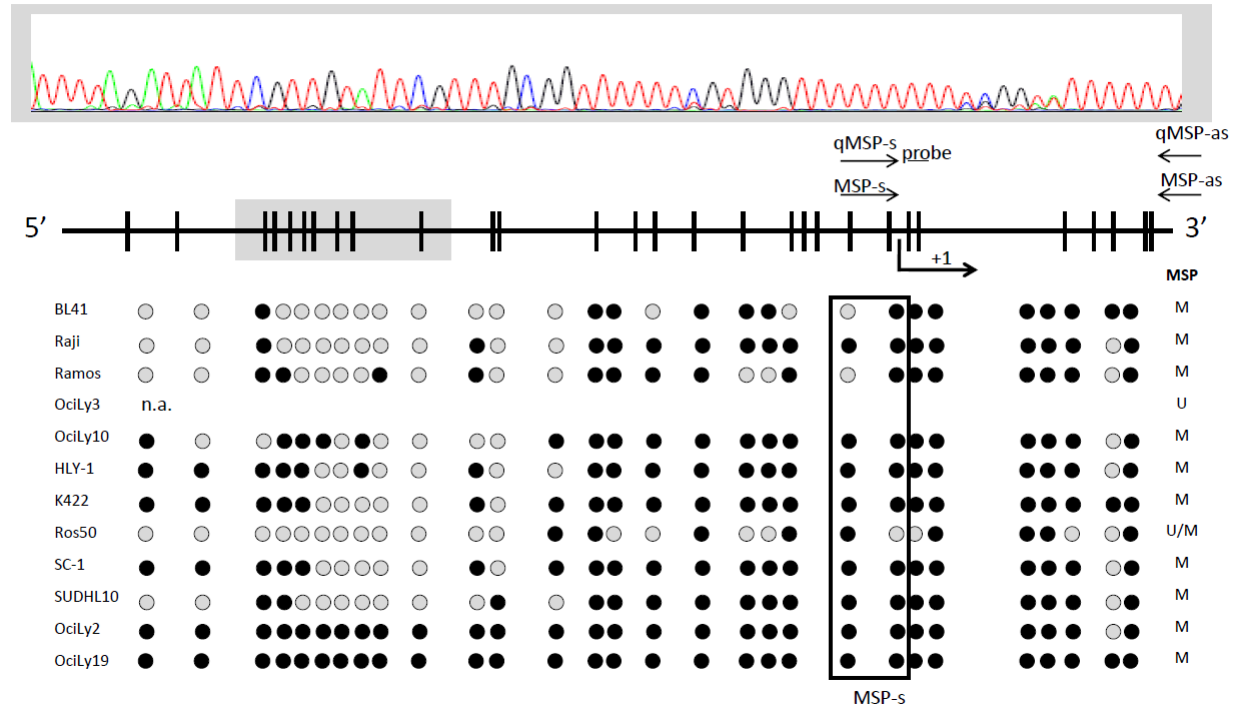

Supplement: pone.0079602.s002.pdf [file pone.0079602.s002.pdf]
