# Supplementary material for: Identification of Highly Methylated Genes across Various Types of B-Cell Non-Hodgkin Lymphoma
Source: PubMed Central journal article supplement (PMC3834187; doi:10.1371/journal.pone.0079602), 2013-11-19
Supplement: pone.0079602.s003.pdf [file pone.0079602.s003.pdf]

Table S1

| MSP Primer set | Sense primer                   | Antisense primer               | Amplicon length |
|----------------|--------------------------------|--------------------------------|-----------------|
| AREG M         | TTTTGACGTTATGGGTTGC            | CCTCGAACTATCCCGAAAC            | 122             |
| AREG U         | GGTTTTGATGTTATGGGTTGT          | CCTCAAACCTATCCCAAACCT          | 122             |
| C10orf118 M    | TTACGTTGAAGATACGAACGC          | ACTTCCCRACTCTCATACGA           | 118             |
| C10orf118 U    | GTTATGTTGAAGATATGAATGT         | AACTTCCCAACTCTCATACAA          | 118             |
| COMMD6 M       | TTAGGTCGTTAGGGTAGGAC           | TTAACATCCAACGACGACTC           | 123             |
| COMMD6 U       | GTTAGGTTGTTAGGGTAGGAT          | CTTAACATCCAACAACAACCTC         | 123             |
| DSP M          | AGGAGATTCGTTTCGTCGTC           | CGAAATCGCTACTCGCTACC           | 171             |
| DSP U          | GGGAGGAGATTTGTTTTGTTGTT        | TCACAAAATCACTACTCACTACC        | 171             |
| DUSP1 M        | TGA CGT TAT CGT TTC GTT AC     | CGC GTT TAT ATA CGA CCT CT     | 107             |
| DUSP1 U        | GGG TGA TGT TAT TGT TTT GTT AT | AAA CAC ATT TAT ATA CAA CCT CT | 107             |
| EPHA4 M        | CGGGTTTACGTTATCGGTC            | CAACCATAATTCGCCGATAC           | 129             |
| EPHA4 U        | TGGTGGGTTTATGTTATTGGTT         | CCCAACCATAATTCACCAATACC        | 129             |
| FOS M          | ATAAAAGTAGTGGTTGCGGC           | ACACGATCACTACTCGTTTCG          | 110             |
| FOS U          | GTTATAAAAGTAGTGGTTGTGGT        | AACACAATCACTACTCATTCACT        | 110             |
| FZD8 M         | AGTGATTTGTTGTTGGTC             | ACAACGACACGATAATCTCTT          | 104             |
| FZD8 U         | GAAGTGATTTTGTGTTGGTT           | ACACAACAACAATAATCTCTT          | 104             |
| GNG7 M         | GTCGGGACGTTAGGGTTC             | GCGAACGCCCTTACCTAC             | 142             |
| GNG7 U         | TTTGTGGGATGTTAGGGTTT           | TTCACAAACACCCCTTACCTAC         | 142             |
| HERC1 M        | ATTCGTGAGATTCGTTTGAC           | AAACTACGACGATCGCGT             | 111             |
| HERC1 U        | TAAATTTGTGAGATTTGTTTGAT        | AAACTACAACAATCACATCCT          | 111             |
| JAM3 M         | TTGTTATTATGGTGTGCGTTC          | GCGACGCGACTTATAATC             | 113             |
| JAM3 U         | TTTTTGTTATTATGGTGTGGTTT        | ACAACACAACCTTATAATCCCC         | 113             |
| JUN M          | TTTATTTTCGTGAGTTTTCGC          | ATTAACCTCGCGTCGCTCT            | 100             |
| JUN U          | TATTTTATTTTGTGAGTTTTTGT        | CCCATTAACCTCACATCACTCT         | 100             |

| MSP Primer set | Sense primer              | Antisense primer        | Amplicon lenght |
|----------------|---------------------------|-------------------------|-----------------|
| JUNB M         | TTTTGATAGTGACGCGAGTC      | ACGAAAATACGCTCCGATTA    | 100             |
| JUNB U         | GTTTTTTGATAGTGATGTGAGTT   | ACAAAAATACACTCCAATTAACC | 100             |
| JUND M         | ATGTAAATGAGCGACGTTATTC    | TCCACTAACGACGACTCCTA    | 119             |
| JUND U         | TTTATGTAAATGAGTGATGTTATTT | CTCCACTAACAACTCCTAC     | 119             |
| KCNH2 M        | TAGTATTGGATCGGTTGGGC      | AACTCCTACAACGACGCTCC    | 114             |
| KCNH2 U        | TAGTATTGGATTGGTTGGGT      | AACTCCTACAACAACACTCC    | 114             |
| KLF2 M         | GCGTTTATAAGGTTTGGGC       | ACACCGATAAATAACTACCCGA  | 100             |
| KLF2 U         | GTGTTTATAAGGTTTGGGT       | ACACCAATAAATAACTACCCAA  | 100             |
| KLF9 M         | TGAGTTAGGAGGTTCCGGATC     | TTCGCTACCTCGTACTACCC    | 135             |
| KLF9 U         | GTGAGTTAGGAGGTTTGGATT     | TTTCACTACCTCATACTACCC   | 135             |
| MTSS1 M        | CGTTCGTTAGGTAGGGTGTC      | CGCTAAACCGAAACCTCTC     | 105             |
| MTSS1 U        | GGTGTGTTAGGTAGGGTGTT      | AACACTAAACCAAACCTCTC    | 105             |
| MYLIP M        | GCGGTTAGGGAAATTTAGTC      | CCTACGCTACGACAAAACT     | 167             |
| MYLIP U        | GGTGGTTAGGGAAATTTAGTT     | ACCTACACTACAACAAAACT    | 167             |
| NR4A2 M        | AATCGGTTTTGTTCTGAC        | CTTACGCTACCGTACCAA      | 155             |
| NR4A2 U        | TAAAATTGGTTTTGTTGTGAT     | TAACCTACTACTACCACTACCAA | 155             |
| PITHD1 M       | GTAGCGGCGTTTTTTACGAC      | ACCCCCGCCGTAACATAAC     | 168             |
| PITHD1 U       | GTAGTGGTGTTTTTTATGAT      | ACCCCCACCATAACTATAAC    | 168             |
| PTPN12 M       | CGGGAGTTTAGTCGGTGTC       | CCGACTACGATCGCTAACC     | 175             |
| PTPN12 U       | GTTGGGAGTTTAGTTGGTGTT     | CCAACACTACAATCACTAACCCC | 175             |
| RGS2 M         | GAAGTCGGGGTCGTAGAC        | AAAACGCGAATTAATCGACT    | 123             |
| RGS2 U         | TAAGAAGTTGGGGTTGTAGAT     | AAAAACACAAATTAATCAACTAC | 123             |
| TMED2 M        | ATTTTTGGTTTTTTCGGAGTC     | ATAAATTAACGAACTCCCGC    | 112             |
| TMED2 U        | AAAATTTTTGGTTTTTGGAGTT    | ATAAATTAACAACTCCACAAC   | 112             |
| TRIM36 M       | AGGTTGATTTGAGATGCGTC      | CGACGCGAAAATCTAAAAAA    | 172             |

| MSP Primer set | Sense primer             | Antisense primer        | Amplicon length |
|----------------|--------------------------|-------------------------|-----------------|
| TRIM36 U       | GGAAGGTTGATTTGAGATGTGTT  | CTCAACACAAAAATCTAAAAAAA | 172             |
| TXNIP M        | AGCGATTTTATTGATTGGTC     | CAAAAAACGAAAACGTCTCT    | 149             |
| TXNIP U        | TATAGTGATTTTATTGATTGGTT  | AAACAAAAACAAAAACATCTCT  | 149             |
| WBSCR16 M      | AGGTTAGGTAAGAAATGTCGC    | AAAACAAAAACGCTAACGAC    | 160             |
| WBSCR16 U      | GTAAGGTTAGGTAAGAAATGTTGT | AAAACAAAAACACTAACAACAAC | 160             |

| BSP Primer set | Sense primer           | Antisense primer         | Amplicon length |
|----------------|------------------------|--------------------------|-----------------|
| BSP DSP        | GTGTGGTTTAGGYGTTTAGTG  | AAACCTCCRTTACAACCTCATATC | 347             |
| BSP FZD8       | GGAAGGGTTTTGTTTAGG     | ATCTCTTAACATAACCAACTCCTT | 322             |
| BSP KLF9       | ATTTAATTGTTTGGGAGTTGGA | CCCCTCCAATTAACCAATAAA    | 369             |
| BSP MTSS1      | AGAATGGGYGTTTTTTTAGA   | CCRCAAAAAAACCTACTAAT     | 310             |
| BSP NR4A2      | AAGTTGGTTATTAAGGTGAAYG | CRACCRCTAAACAAACAA       | 289             |

| qMSP Primer set | Sense primer            | Antisense primer            | Probe                    | Amplicon length |
|-----------------|-------------------------|-----------------------------|--------------------------|-----------------|
| COMMD6          | GCGTTAGGTCGTTAGGGGTAGG  | ACTTAACATCCAACGACGACTCG     | GACGTTGTTTATGGAGGCG      | 128             |
| DSP             | GGAGGAGATTCGTTTCGTCG    | AATCGCTACTCGCTACCTAAACCC    | TTTCGACGTAGTTTTTTTTCGTT  | 170             |
| FZD8            | GAAGTGATTCGTTGTTGGTCG   | GATACCCTTACACAACGACACGATAAT | GGCGTTGTTGTAGCGTT        | 117             |
| KCNH2           | GTATTGGATCGGTTGGGCG     | GCAACCCGCCAAACTC            | ATAGGTTGCGTTGTTGGC       | 124             |
| KLF9            | CGTGAGTTAGGAGGTTTCGATC  | CGTTTCGCTACCTCGTACTA        | GTTACGGGATCGCGAGGT       | 139             |
| MTSS1           | CGTTAGGTAGGGTGTCGATACGT | GCCTCCCTCTCAAAGCCA          | TTTCGCGTTGCGACGG         | 99              |
| NR4A2           | TAAAATCGTTTTGTTTCGTGACG | ATTTATATAACTTACGCTACCGCTA   | TAGGTCGGAAATATATTAAAGCGA | 168             |
