# Supplementary material for: Identification of Highly Methylated Genes across Various Types of B-Cell Non-Hodgkin Lymphoma
Source: PubMed Central journal article supplement (PMC3834187; doi:10.1371/journal.pone.0079602), 2013-11-19
Supplement: pone.0079602.s004.pdf [file pone.0079602.s004.pdf]

Table S2

|          | Threshold |
|----------|-----------|
| COMMD6   | 1         |
| DSP      | 1         |
| FZD8     | 1         |
| KCNH2    | 4         |
| KLF9     | 1         |
| MTSS1    | 4         |
| NR4A2    | 1         |
| PPP1R14A | 1         |
