# Supplementary material for: Identification of Highly Methylated Genes across Various Types of B-Cell Non-Hodgkin Lymphoma
Source: PubMed Central journal article supplement (PMC3834187; doi:10.1371/journal.pone.0079602), 2013-11-19
Supplement: pone.0079602.s005.pdf [file pone.0079602.s005.pdf]

**Table S3**

| <b>Gene</b>     | <b>Gene name</b>                                                           | <b>Location</b> |
|-----------------|----------------------------------------------------------------------------|-----------------|
| AREG            | Amphiregulin                                                               | 4q13.3          |
| C10orf118       | Chromosome 10 open reading frame 118                                       | 10q25.3         |
| CD69            | CD69 molecule                                                              | 12p13           |
| COMMD6          | COMM domain containing 6                                                   | 13q22           |
| <b>DSP</b>      | Desmoplakin                                                                | 6p24            |
| DUSP1           | Dual specificity phosphatase 1                                             | 5q34            |
| EPHA4           | EPH receptor A4                                                            | 2q36.1          |
| FOS             | FBJ murine osteosarcoma viral oncogene homolog                             | 14q24.3         |
| <b>FZD8</b>     | Frizzled family receptor 8                                                 | 10p11.21        |
| GNG7            | Guanine nucleotide binding protein, gamma 7                                | 19p13.3         |
| HERC1           | HECT and RLD domain containing E3 ubiquitin protein ligase family member 1 | 15q22           |
| JAM3            | Junctional adhesion molecule 3                                             | 11q25           |
| JUN             | Jun proto-oncogene                                                         | 1p32-p31        |
| JUNB            | Jun B proto-oncogene                                                       | 19p13.2         |
| JUND            | Jun D proto-oncogene                                                       | 19p13.2         |
| <b>KCNH2</b>    | Potassium voltage-gated channel, subfamily H, member 2                     | 7q36.1          |
| KLF2            | Kruppel-like factor 2                                                      | 19p13.11        |
| <b>KLF9</b>     | Kruppel-like factor 9                                                      | 9q13            |
| <b>MTSS1</b>    | Metastasis suppressor 1                                                    | 8p22            |
| MYLIP           | Myosin regulatory light chain interacting protein                          | 6p23-p22.3      |
| <b>NR4A2</b>    | Nuclear receptor subfamily 4, group A, member 2                            | 2q22-q23        |
| PITHD1          | PITH domain containing 1                                                   | 1p36.11         |
| <b>PPP1R14A</b> | Protein phosphatase 1, regulatory subunit 14A                              | 19q13.1         |
| PTPN12          | Protein tyrosine phosphatase, non-receptor type 12                         | 7q11.23         |
| RGS2            | Regulator of G-protein signaling 2                                         | 1q31            |
| SLC2A3          | Solute carrier family 2 , member 3                                         | 12p13.3         |
| TMED2           | Transmembrane emp24 domain trafficking protein 2                           | 12q24.31        |
| TRIM36          | Tripartite motif containing 36                                             | 5q22.3          |
| TXNIP           | Thioredoxin interacting protein                                            | 1q21.1          |
| WBSCR16         | Williams-Beuren syndrome chromosome region 16                              | 7q11.23         |
